# Supplementary material for: Tuning compatibility and water uptake by protein charge modification in melt-polymerizable protein-based thermosets
Source: Royal Society of Chemistry journal article supplement (doi:10.1039/d1ma00485a), 2022-01-01
Supplement: d1ma00485a1.pdf [file d1ma00485a1.pdf]

ARTICLE

**Supporting information**

**Tuning compatibility and water uptake by protein charge modification in melt-polymerizable protein-based thermosets**

Emil Andersen<sup>a,b,c,\*\*</sup>, Wui Yarn Chan<sup>a,\*\*</sup>, Sarah Av-Ron<sup>a</sup>, Bradley D. Olsen<sup>a,\*</sup>

<sup>a</sup>Department of Chemical Engineering, MIT, 25 Ames Street, Cambridge, MA 02142, USA

<sup>b</sup>LEGO System A/S, 16 Kløvermarken, Billund 7190, Denmark

<sup>c</sup>Faculty of Technical Sciences, Aarhus University, 40 Åbogade, Aarhus 8000, Denmark

\*Corresponding Author

\*\*These authors contributed equally to this work.

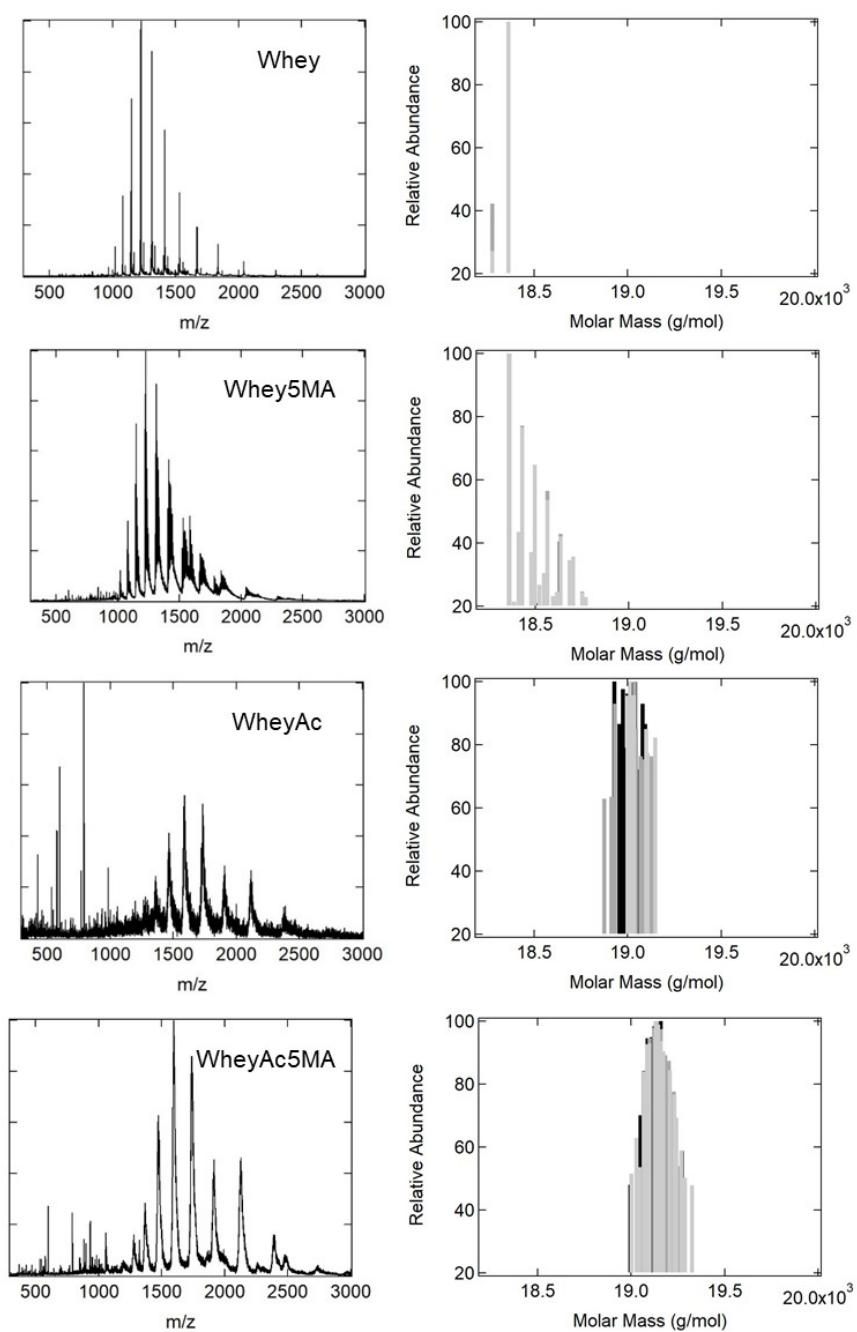

**Figure S1.** Representative raw mass spectra and deconvoluted molar masses for whey, wheyAc, and their methacrylated counterparts. Deconvoluted molar masses for three LC-MS replicates are shown.

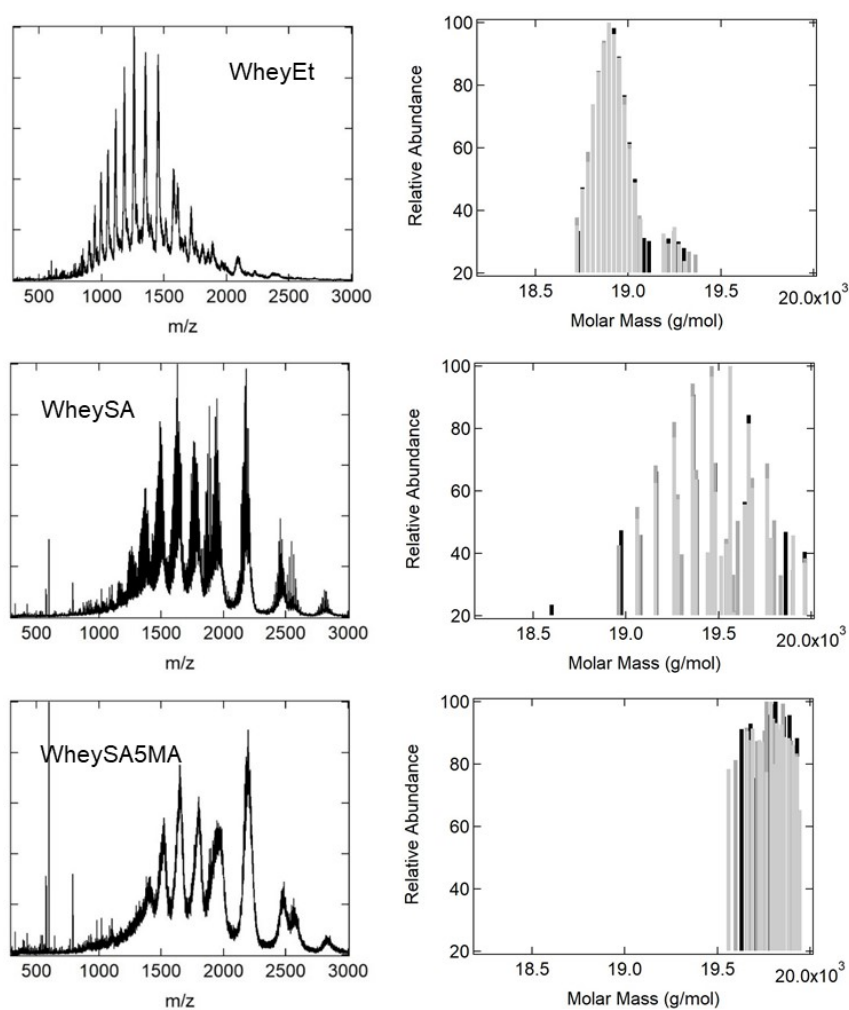

**Figure S2.** Representative raw mass spectra and deconvoluted molar masses for wheyEt, wheySA, and wheySA5MA. Deconvoluted molar masses for three LC-MS replicates are shown.

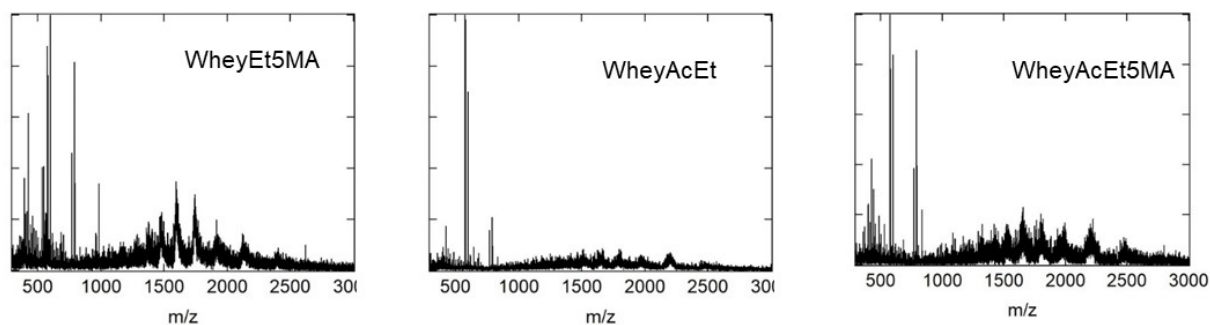

**Figure S3.** Representative raw mass spectra for wheyEt5MA, wheyAcEt, and wheyAcEt5MA. Deconvolution was not performed due to the low signal to noise ratio

## ARTICLE

**Table S1.** Blending results for whey- non-ionic surfactant- n-BA. Miscible mixtures are noted with a 'Y'.

|              |                                  | Whey |     |     |
|--------------|----------------------------------|------|-----|-----|
|              |                                  | 1:1  | 1:2 | 1:3 |
| Ecosurf      | Nonionic, fatty acid based       | y    | y   | y   |
| BG-10        | Nonionic, alkyl polyglucoside    | y    | y   | y   |
| Triton X-100 | Nonionic, octylphenol ethoxylate | y    | y   | y   |
| Glycerol     | Nonionic polyol                  | y    | y   |     |

**Table S2.** Theoretical bovine  $\beta$ -lactoglobulin net charge at pH = 7, based on amino acid sequence and number of modification from LCMS results. Insoluble wheyEt5MA had 2 estimated methacrylations per bovine  $\beta$ -lactoglobulin while wheyAcEt5MA was assumed to have same degree of acetylation and esterification as wheyAc and wheyEt, respectively, and 2 methacrylate groups.

|                               | Whey5MA | WheyAc5M<br>A | WheyEt5M<br>A | WheySA5M<br>A | WheyAcEt5M<br>A |
|-------------------------------|---------|---------------|---------------|---------------|-----------------|
| <b>Theoretical net charge</b> | -8.8    | -14.8         | 14.2          | -24.7         | 6.2             |

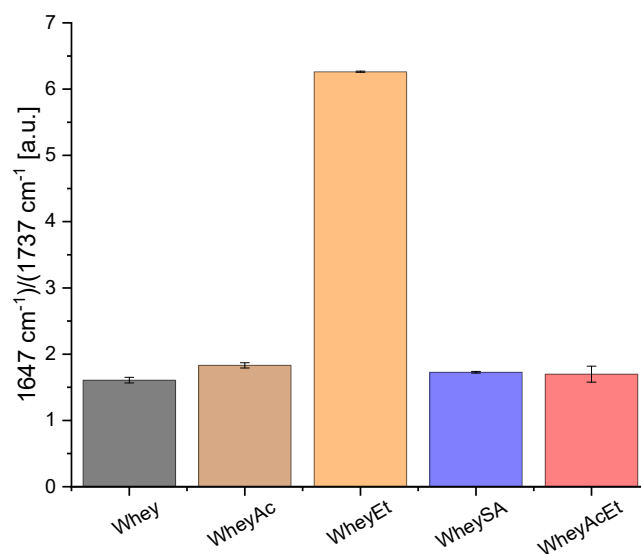**Figure S4.** ATR-FTIR performed on protein-surfactant-poly(n-butyl acrylate) blends prepared using non-methacrylated proteins. Differences in compatibility highlighted using the peak area ratio of the protein amide I (centered at 1647  $\text{cm}^{-1}$ ) to the poly(n-butyl acrylate) carbonyl (centered at 1737  $\text{cm}^{-1}$ ).

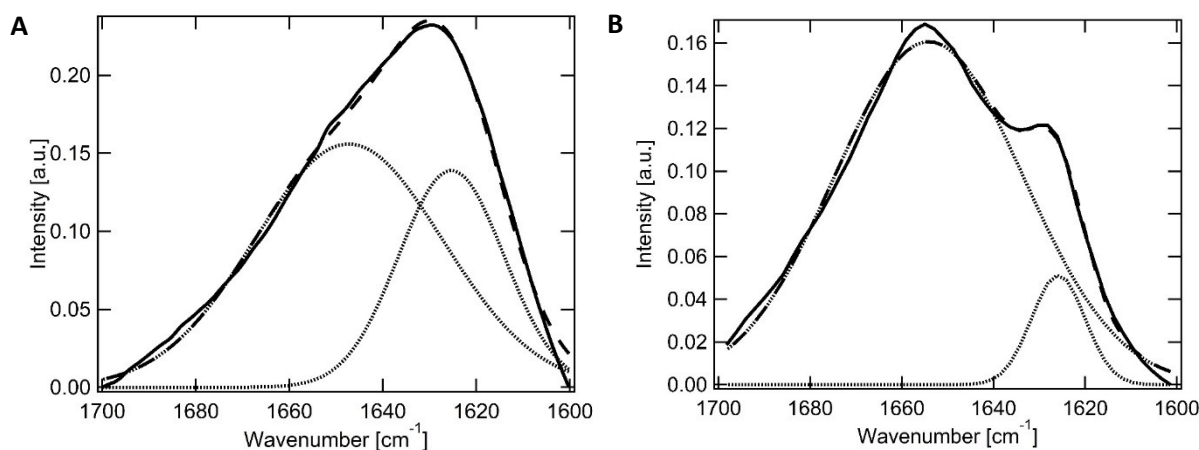

**Figure S5.** Representative FTIR plot showing the amide I baseline corrected peak (solid line), deconvoluted peaks (dotted line), and the fit (dash line). This measurement was taken on wheySA5MA protein powder (a) and copolymer (b).

**Table S3.** Deconvoluted ATR-FTIR peak positions (in  $\text{cm}^{-1}$ ) for modified protein powder and protein-surfactant-poly(*n*-butyl acrylate) copolymer. Peak fitting was performed on amide I peaks, with peak positions, heights, and widths as fitting parameters. The two peaks at 1618-1628  $\text{cm}^{-1}$  and 1647-1657  $\text{cm}^{-1}$  were assigned to  $\beta$ -sheet, and  $\alpha$ -helix and unordered structures respectively.<sup>1</sup> N=1 for protein powder, N=5 for copolymer.

| <b>Unmodified whey protein</b>      |         |           |           |           |             |
|-------------------------------------|---------|-----------|-----------|-----------|-------------|
| Whey                                |         |           |           |           |             |
| Peak 1 ( $\text{cm}^{-1}$ )         | 1628    |           |           |           |             |
| Peak 2 ( $\text{cm}^{-1}$ )         | 1653    |           |           |           |             |
| <b>Methacrylated protein powder</b> |         |           |           |           |             |
|                                     | Whey5MA | WheyAc5MA | WheyEt5MA | WheySA5MA | WheyAcEt5MA |
| Peak 1 ( $\text{cm}^{-1}$ )         | 1626    | 1624      | 1623      | 1625      | 1623        |
| Peak 2 ( $\text{cm}^{-1}$ )         | 1650    | 1648      | 1647      | 1647      | 1647        |
| <b>Copolymer</b>                    |         |           |           |           |             |
|                                     | Whey5MA | WheyAc5MA | WheyEt5MA | WheySA5MA | WheyAcEt5MA |
| Peak 1 ( $\text{cm}^{-1}$ )         | 1624    | 1626      | 1619      | 1626      | 1626        |
| Peak 2 ( $\text{cm}^{-1}$ )         | 1657    | 1655      | 1657      | 1655      | 1657        |

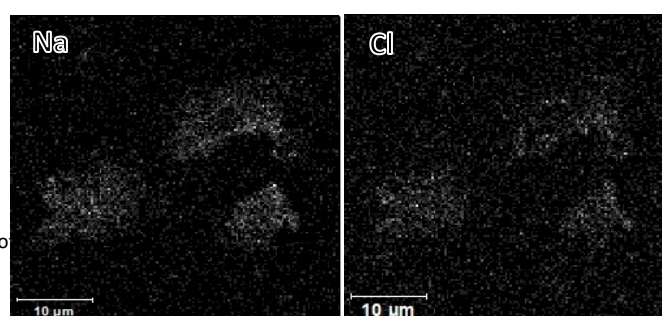

**Figure S6.** SEM-EDX of WheySA5MA with Na) sodium and Cl) chloride mapping, brighter is higher count rate.

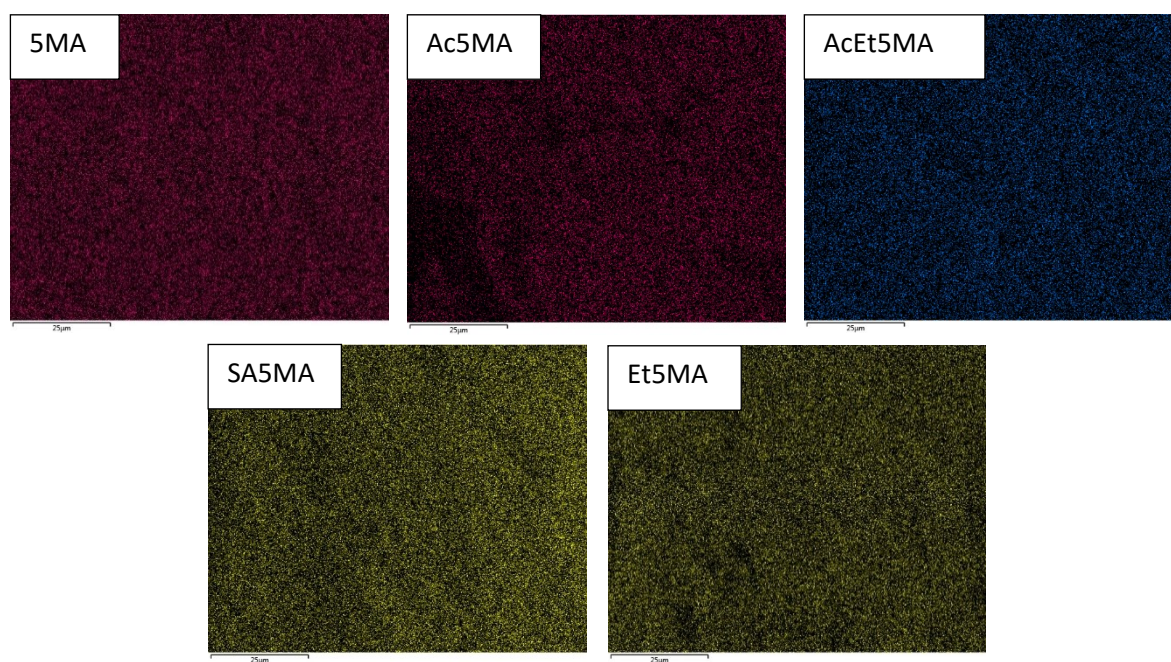

**Figure S7.** SEM-EDX mapping of nitrogen (N) of protein copolymers at 3000x magnification.

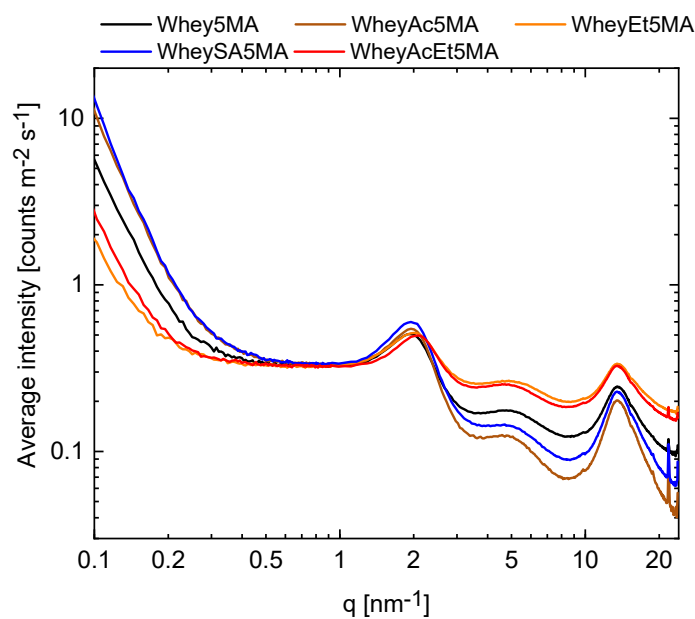

**Figure S8.** Representative SAXS and WAXS curves for whey5MA copolymer, with and without charge modification. WAXS curve offset to match the overlapping region with SAXS.

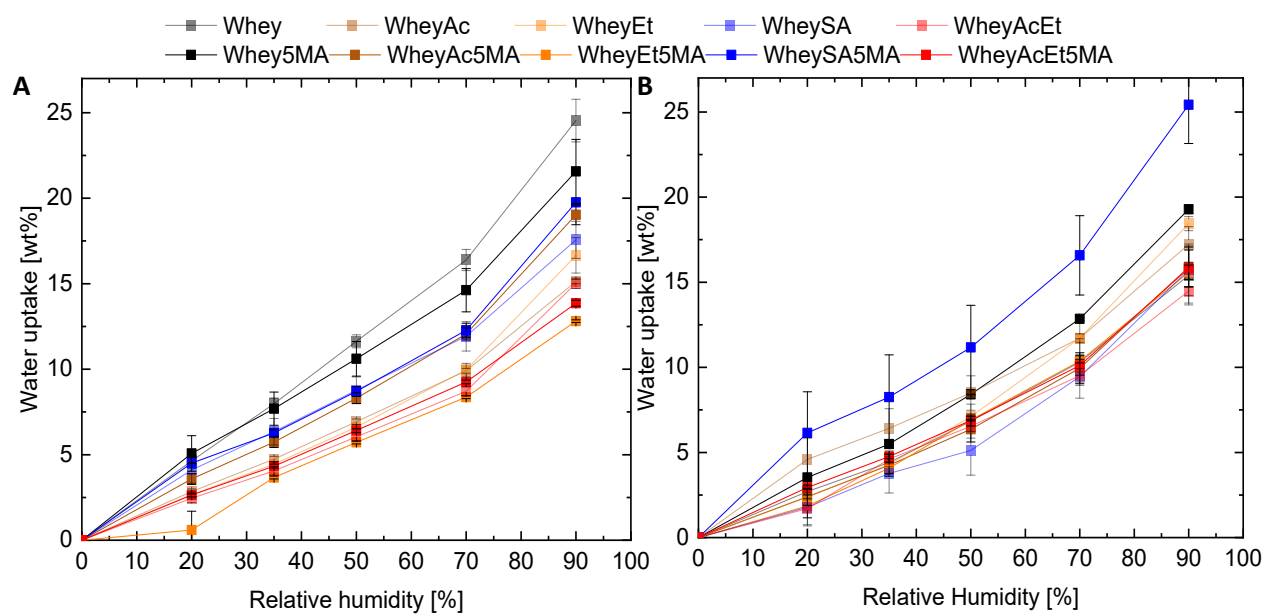

**Figure S9.** Relative-humidity water uptake of A) protein and B) protein:surfactant 1:1 complex.

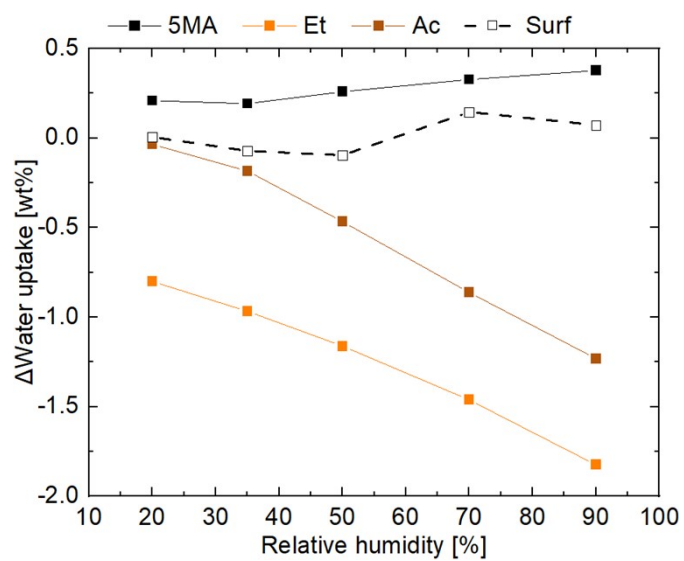

**Figure S10.** Main effect estimates of protein modification and complexation on water uptake of proteins. The  $2^4$  factorial analysis was performed with methacrylation (5MA), esterification (Et), acetylation (Ac) and surfactant complexation (surf) as factors.



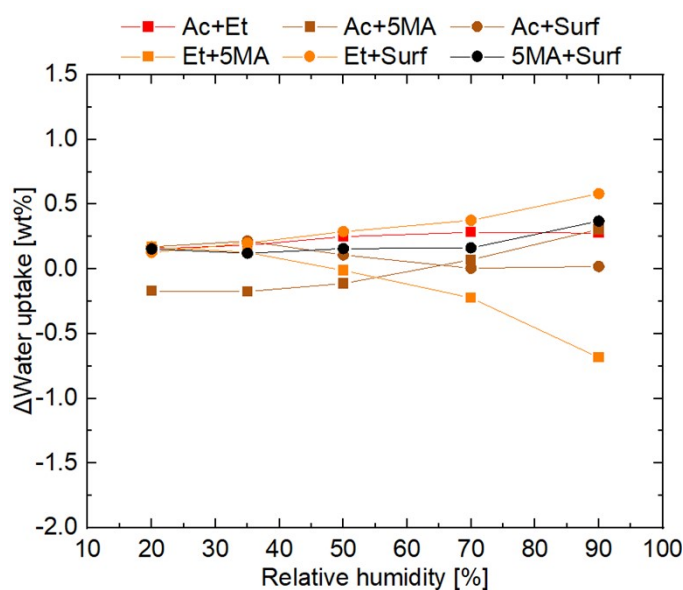

**Figure S11.** Two-way interaction estimates of protein modification and complexation on water uptake of proteins. The  $2^4$  factorial analysis was performed with methacrylation (5MA), esterification (Et), acetylation (Ac) and surfactant complexation (surf) as factors.

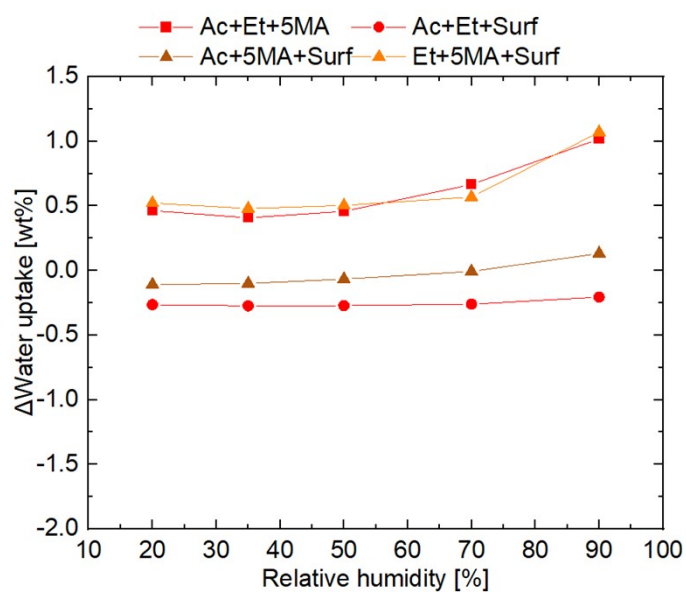

**Figure S12.** Three-way interaction estimates of protein modification and complexation on water uptake of proteins. The  $2^4$  factorial analysis was performed with methacrylation (5MA), esterification (Et), acetylation (Ac) and surfactant complexation (surf) as factors.
